# Supplementary material
Source: publisher figshare collection journal article supplement (https://acs.figshare.com/ndownloader/files/4756753)
Supplement: Supplementary file 1 [file 4756753]

## Synthesis and Structure of Cyclic

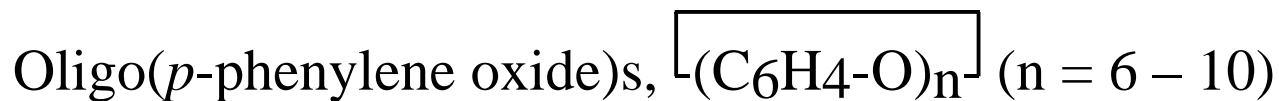

*Daisuke Takeuchi, Itaru Asano, and Kohtaro Osakada\**

**Crystal Structure Determination.** Crystals were mounted in glass capillary. The data were collected at a temperature of  $-160 \pm 1$  °C to a maximum  $2\theta$  value of  $55.0^\circ$  on Rigaku Saturn CCD area detector. Calculations were carried out by using the program package Crystal Structure for Windows. The structure was solved by direct methods and expanded using Fourier techniques. A full matrix least squares refinement was used for non-hydrogen atoms with anisotropic thermal parameters. Atomic scattering factors were obtained from the literature.<sup>9</sup> Crystallographic data and details of refinement of the cyclic oligo(*p*-phenylene oxide)s are summarized in Table S-1.

TABLE S-1. Crystallographic Parameters of Cyclic Oligo(*p*-phenylene oxide)s

|                                                 | (C-6) <sub>2</sub> (CH <sub>2</sub> Cl <sub>2</sub> ) <sub>3</sub> | C-7·(CHCl <sub>3</sub> ) <sub>2</sub>                          | C-8·(CHCl <sub>3</sub> ) <sub>2</sub>                          | C-9·(CHCl <sub>3</sub> )(C <sub>6</sub> H <sub>14</sub> )      |
|-------------------------------------------------|--------------------------------------------------------------------|----------------------------------------------------------------|----------------------------------------------------------------|----------------------------------------------------------------|
| Empirical Formula                               | C <sub>75</sub> H <sub>54</sub> Cl <sub>6</sub> O <sub>12</sub>    | C <sub>44</sub> H <sub>30</sub> Cl <sub>6</sub> O <sub>7</sub> | C <sub>50</sub> H <sub>34</sub> Cl <sub>6</sub> O <sub>8</sub> | C <sub>61</sub> H <sub>51</sub> Cl <sub>3</sub> O <sub>9</sub> |
| Formula Weight                                  | 1359.96                                                            | 883.43                                                         | 975.53                                                         | 1034.43                                                        |
| Crystal System                                  | Triclinic                                                          | monoclinic                                                     | Triclinic                                                      | Triclinic                                                      |
| Space Group                                     | P-1 (# 2)                                                          | P2 <sub>1</sub> /n (# 14)                                      | P-1 (# 2)                                                      | P-1 (# 2)                                                      |
| <i>a</i> , Å                                    | 10.127(8)                                                          | 14.61(2)                                                       | 9.596(7)                                                       | 10.566(9)                                                      |
| <i>b</i> , Å                                    | 12.462(9)                                                          | 10.187(15)                                                     | 14.145(10)                                                     | 14.099(11)                                                     |
| <i>c</i> , Å                                    | 25.76(2)                                                           | 26.99(4)                                                       | 17.077(13)                                                     | 19.13(1)                                                       |
| <i>α</i> , deg                                  | 84.40(4)                                                           |                                                                | 83.87(4)                                                       | 77.94(4)                                                       |
| <i>β</i> , deg                                  | 84.69(3)                                                           | 101.36(3)                                                      | 81.88(3)                                                       | 74.87(3)                                                       |
| <i>γ</i> , deg                                  | 78.62(3)                                                           |                                                                | 87.12(3)                                                       | 76.71(3)                                                       |
| <i>V</i> , Å <sup>3</sup>                       | 3163(4)                                                            | 3938(11)                                                       | 2280(3)                                                        | 2642.8(35)                                                     |
| <i>Z</i>                                        | 2                                                                  | 4                                                              | 2                                                              | 2                                                              |
| <i>D</i> <sub>calcd</sub> , g cm <sup>-3</sup>  | 1.428                                                              | 1.490                                                          | 1.421                                                          | 1.300                                                          |
| No. of data                                     | 17660                                                              | 28432                                                          | 16649                                                          | 15257                                                          |
| No. of obsd. data                               | 4234                                                               | 2616                                                           | 5569                                                           | 3439                                                           |
| No. of Variables                                | 892                                                                | 544                                                            | 611                                                            | 655                                                            |
| <i>R</i> ( <i>F</i> <sub>0</sub> )              | 0.069                                                              | 0.056                                                          | 0.081                                                          | 0.110                                                          |
| <i>R</i> <sub>w</sub> ( <i>F</i> <sub>0</sub> ) | 0.104                                                              | 0.050                                                          | 0.133                                                          | 0.159                                                          |
| GOF                                             | 0.997                                                              | 0.907                                                          | 0.954                                                          | 0.784                                                          |

## Thermogravimetric Analysis and Differential Scanning Carolimetry

Results of thermogravimetric analysis and differential scanning carolimetry of the obtained cyclic oligo(*p*-phenylene oxide)s are summarized in Table S-2. Temperature of 5% weight loss,  $T_d^5$ , is raised with increment of the ring size . DSC of **C-6** showed no melting point of **C-6**, presumably due to its higher melting point than decomposition temperature. Melting points of **C-8** and **C-10** are 350 and 148 °C, respectively. First scan of **C-9** shows a single endothermic peak at 280 °C, whereas second scan of **C-9** shows two endothermic peaks at 210 and 273 °C. These results indicate some phase transition takes place at the temperature. The melting points of **C-6**, **C-8**, **C-9**, and **C-10** decrease in this order. On the other hand, melting point of **C-7** is 190 °C, which is exceptionally lower than other cyclic oligo(*p*-phenylene oxide)s. This is probably due to the more flexible structure of **C-7** as revealed by X-ray crystal structure analysis. The melting points of poly(*p*-phenylene oxide) and linear hexamer are 171 °C, which is lower than the cyclic oligo(*p*-phenylene oxide)s.

TABLE S-2. Thermogravimetric Analysis and Differential Scanning Carolimetry of Cyclic Oligo(*p*-phenylene oxide)s

|      | $T_d^5/^\circ\text{C}$ | $T_m/^\circ\text{C}$ |
|------|------------------------|----------------------|
| C-6  | 340                    | -                    |
| C-7  | 380                    | 190                  |
| C-8  | 408                    | 350                  |
| C-9  | 450                    | 210 and 280          |
| C-10 |                        | 148                  |
